# Supplementary material for: Color-tunable emissions realized by Tb3+ to Eu3+ energy transfer in ZnGdB5O10 under near-UV excitation
Source: Royal Society of Chemistry journal article supplement (doi:10.1039/d3dt01959d), 2023-01-01
Supplement: d3dt01959d1.pdf [file d3dt01959d1.pdf]

Supporting Information for

Color-tunable emissions realized by Tb<sup>3+</sup> to Eu<sup>3+</sup> energy transfer  
in ZnGdB<sub>5</sub>O<sub>10</sub> under near-UV excitation

*Yan Gao,<sup>a</sup> Rihong Cong,<sup>ab\*</sup> Tao Yang<sup>\*ab</sup>*

<sup>a</sup> College of Chemistry and Chemical Engineering, Chongqing University,

Chongqing 401331, People's Republic of China

<sup>b</sup> Chongqing Key Laboratory of Theoretical and Computational Chemistry, Chongqing

University, Chongqing 401331, People's Republic of China

\*Corresponding authors: [congrihong@cqu.edu.cn](mailto:congrihong@cqu.edu.cn); [taoyang@cqu.edu.cn](mailto:taoyang@cqu.edu.cn).

**Table S1.** Refined cell lattice parameters from Le Bail fitting on powder XRD data in the space group  $P2_1/n$

| $x$ in $\text{ZnGd}_{1-x}\text{Tb}_x\text{B}_5\text{O}_{10}$ | $a$ (Å)   | $b$ (Å)   | $c$ (Å)   | $\beta$ (°) | $V$ (Å <sup>3</sup> ) |
|--------------------------------------------------------------|-----------|-----------|-----------|-------------|-----------------------|
| 0                                                            | 8.5986(2) | 7.6033(2) | 9.3989(2) | 93.385(2)   | 613.40(3)             |
| 0.1                                                          | 8.5956(3) | 7.6031(3) | 9.3964(3) | 93.397(3)   | 613.05(4)             |
| 0.2                                                          | 8.5933(2) | 7.6024(2) | 9.3948(3) | 93.413(4)   | 612.68(3)             |
| 0.4                                                          | 8.5869(3) | 7.6014(2) | 9.3907(3) | 93.434(3)   | 611.85(3)             |
| 0.6                                                          | 8.5827(4) | 7.6016(4) | 9.3882(4) | 93.461(3)   | 611.39(5)             |
| 0.8                                                          | 8.5758(2) | 7.6008(2) | 9.3854(2) | 93.481(2)   | 610.66(2)             |
| 1.0                                                          | 8.5723(2) | 7.6019(2) | 9.3843(3) | 93.503(5)   | 610.43(3)             |

  

| $y$ in $\text{ZnGd}_{1-y}\text{Eu}_y\text{B}_5\text{O}_{10}$ | $a$ (Å)   | $b$ (Å)   | $c$ (Å)   | $\beta$ (°) | $V$ (Å <sup>3</sup> ) |
|--------------------------------------------------------------|-----------|-----------|-----------|-------------|-----------------------|
| 0.05                                                         | 8.5995(2) | 7.6013(2) | 9.3978(3) | 93.379(2)   | 613.25(0)             |
| 0.10                                                         | 8.5991(2) | 7.6029(2) | 9.3994(2) | 93.373(1)   | 613.46(2)             |
| 0.20                                                         | 8.6015(2) | 7.6031(2) | 9.3997(3) | 93.368(3)   | 613.66(3)             |
| 0.40                                                         | 8.6051(2) | 7.6022(2) | 9.4000(2) | 93.348(2)   | 613.88(2)             |
| 0.60                                                         | 8.6089(2) | 7.6027(2) | 9.4029(3) | 93.322(1)   | 614.39(3)             |
| 0.80                                                         | 8.6138(2) | 7.6040(2) | 9.4069(2) | 93.302(2)   | 615.12(2)             |
| 1.00                                                         | 8.6182(2) | 7.6047(1) | 9.4093(2) | 93.282(2)   | 615.66(2)             |

  

| $z$ in $\text{ZnGd}_{0.2-}$<br>$z\text{Tb}_{0.8}\text{Eu}_z\text{B}_5\text{O}_{10}$ | $a$ (Å) | $b$ (Å) | $c$ (Å) | $\beta$ (°) | $V$ (Å <sup>3</sup> ) |
|-------------------------------------------------------------------------------------|---------|---------|---------|-------------|-----------------------|
|-------------------------------------------------------------------------------------|---------|---------|---------|-------------|-----------------------|

|      |           |           |           |           |           |
|------|-----------|-----------|-----------|-----------|-----------|
| 0.01 | 8.5774(2) | 7.6027(2) | 9.3871(2) | 93.482(2) | 611.02(2) |
| 0.03 | 8.5775(3) | 7.6028(2) | 9.3876(3) | 93.479(1) | 611.07(3) |
| 0.05 | 8.5776(2) | 7.6029(2) | 9.3878(4) | 93.474(2) | 611.10(3) |
| 0.07 | 8.5777(3) | 7.6029(2) | 9.3882(2) | 93.477(3) | 611.13(2) |
| 0.10 | 8.5788(4) | 7.6031(3) | 9.3880(5) | 93.473(1) | 611.20(3) |

**Table S2.** Inter quantum yields for  $\text{ZnGd}_{1-x}\text{Tb}_x\text{B}_5\text{O}_{10}$  ( $0.1 \leq x \leq 1$ )

| Sample                                                       | IQY (%)     |
|--------------------------------------------------------------|-------------|
| $x$ in $\text{ZnGd}_{1-x}\text{Tb}_x\text{B}_5\text{O}_{10}$ | EX = 364 nm |
| 0.1                                                          | 36.97       |
| 0.2                                                          | 53.89       |
| 0.4                                                          | 52.32       |
| 0.6                                                          | 51.83       |
| 0.8                                                          | 65.61       |
| 1.0                                                          | 55.80       |

**Table S3.** Inter quantum yields for  $\text{ZnGd}_{1-y}\text{Eu}_y\text{B}_5\text{O}_{10}$  ( $0.05 \leq y \leq 1$ )

|                                                              |             |
|--------------------------------------------------------------|-------------|
| $y$ in $\text{ZnGd}_{1-y}\text{Eu}_y\text{B}_5\text{O}_{10}$ | EX = 393 nm |
| 0.05                                                         | 62.26       |
| 0.1                                                          | 63.78       |
| 0.2                                                          | 65.76       |
| 0.4                                                          | 88.69       |

|     |       |
|-----|-------|
| 0.6 | 81.87 |
| 0.8 | 69.70 |
| 1.0 | 38.63 |

**Table S4.** Inter quantum yields for  $\text{ZnGd}_{0.2-z}\text{Tb}_{0.8}\text{Eu}_z\text{B}_5\text{O}_{10}$  ( $0.01 \leq z \leq 0.1$ )

| $z$ in $\text{ZnGd}_{0.2-z}\text{Tb}_{0.8}\text{Eu}_z\text{B}_5\text{O}_{10}$ | EX = 346 nm |
|-------------------------------------------------------------------------------|-------------|
| 0.01                                                                          | 66.70       |
| 0.03                                                                          | 98.03       |
| 0.05                                                                          | 85.13       |
| 0.07                                                                          | 78.37       |
| 0.10                                                                          | 71.29       |

**Table S5.** Calculated average lifetime ( $\tau$ ) for  $\text{ZnGd}_{0.2-z}\text{Tb}_{0.8}\text{Eu}_z\text{B}_5\text{O}_{10}$  ( $0 \leq z \leq 0.1$ ) and energy transfer efficiency from  $\text{Tb}^{3+}$  to  $\text{Eu}^{3+}$  against  $z$

| $z$  | $A_1$ | $\tau_1$ (ms) | $A_2$ | $\tau_2$ (ms) | $\tau$ (ms) | $\eta_{ET}=1-\tau/\tau_0$ (%) |
|------|-------|---------------|-------|---------------|-------------|-------------------------------|
| 0    | 143   | 0.150         | 991   | 2.345         | 2.325       |                               |
| 0.01 | 590   | 0.277         | 690   | 1.106         | 0.960       | 58.71                         |
| 0.03 | 861   | 0.213         | 583   | 0.709         | 0.557       | 76.04                         |
| 0.05 | 1360  | 0.158         | 342   | 0.835         | 0.544       | 76.60                         |
| 0.07 | 2745  | 0.085         | 410   | 0.341         | 0.181       | 92.22                         |
| 0.10 | 5081  | 0.060         | 307   | 0.318         | 0.123       | 94.71                         |

**Table S6.** CIE chromaticity coordinates for  $\text{ZnGd}_{0.2-z}\text{Tb}_{0.8}\text{Eu}_z\text{B}_5\text{O}_{10}$  ( $0 \leq z \leq 0.1$ ) excited by 346 nm irradiation

| $z$ in $\text{ZnGd}_{0.2-z}\text{Tb}_{0.8}\text{Eu}_z\text{B}_5\text{O}_{10}$ | CIE ( $x, y$ )   |
|-------------------------------------------------------------------------------|------------------|
| 0                                                                             | (0.2915, 0.5915) |
| 0.01                                                                          | (0.4675, 0.4796) |
| 0.03                                                                          | (0.5365, 0.4317) |
| 0.05                                                                          | (0.5887, 0.3952) |
| 0.07                                                                          | (0.6080, 0.3815) |
| 0.10                                                                          | (0.6207, 0.3731) |

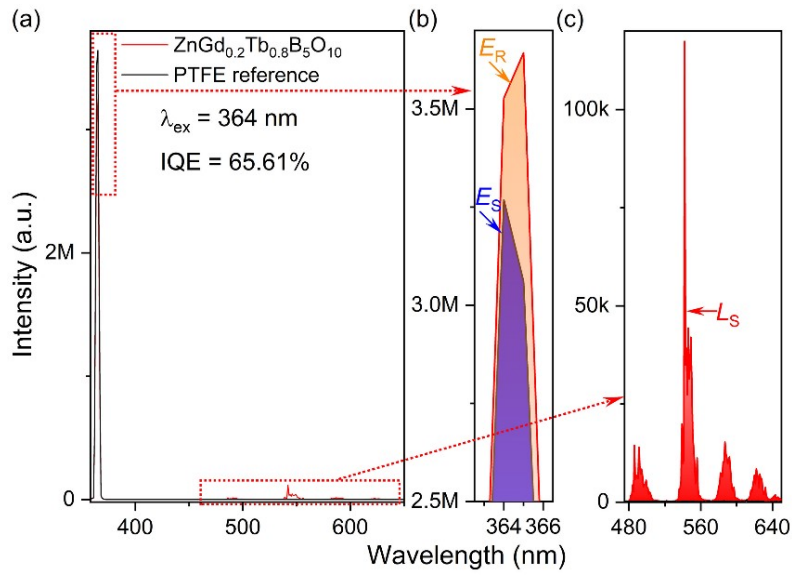

**Fig. S1.** (a) Representative calculation of the inter quantum efficiency of  $\text{ZnGd}_{0.2}\text{Tb}_{0.8}\text{B}_5\text{O}_{10}$ , where  $L_S$  and  $E_S$  are the emission and excitation spectra of the sample, respectively, and  $E_R$  is the excitation spectra of the reference; (b) and (c) are the enlargement figures.

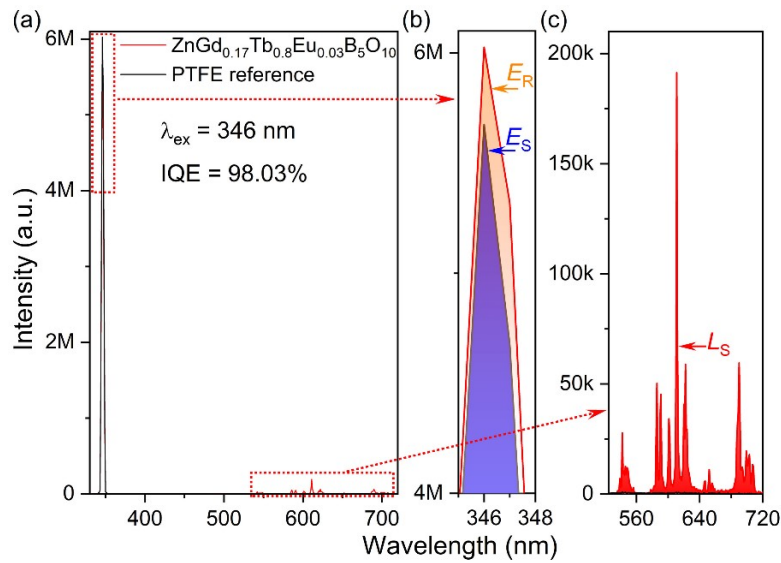

**Fig. S2.** (a) Representative calculation of the Inter quantum efficiency of  $\text{ZnGd}_{0.17}\text{Tb}_{0.8}\text{Eu}_{0.03}\text{B}_5\text{O}_{10}$ ; (b) and (c) are the enlargement figures.

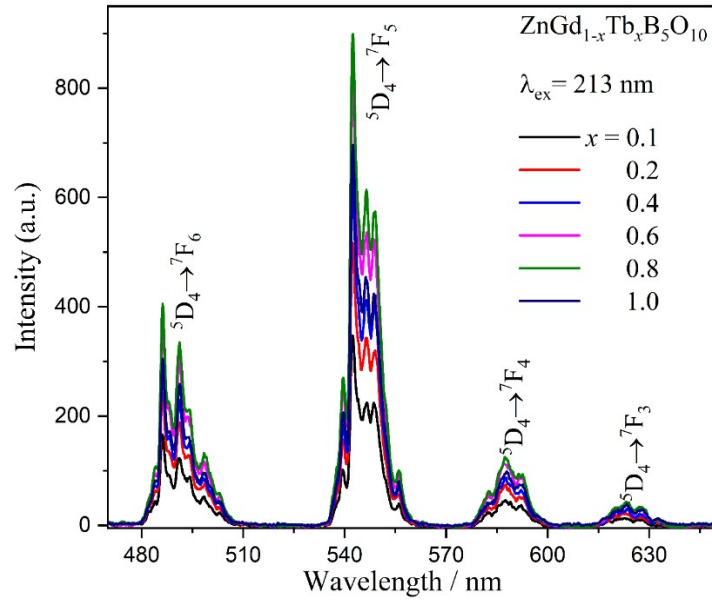

**Fig. S3.** PL emission spectra under the excitation at 213 nm for  $\text{ZnGd}_{1-x}\text{Tb}_x\text{B}_5\text{O}_{10}$  ( $0.1 \leq x \leq 1$ ).

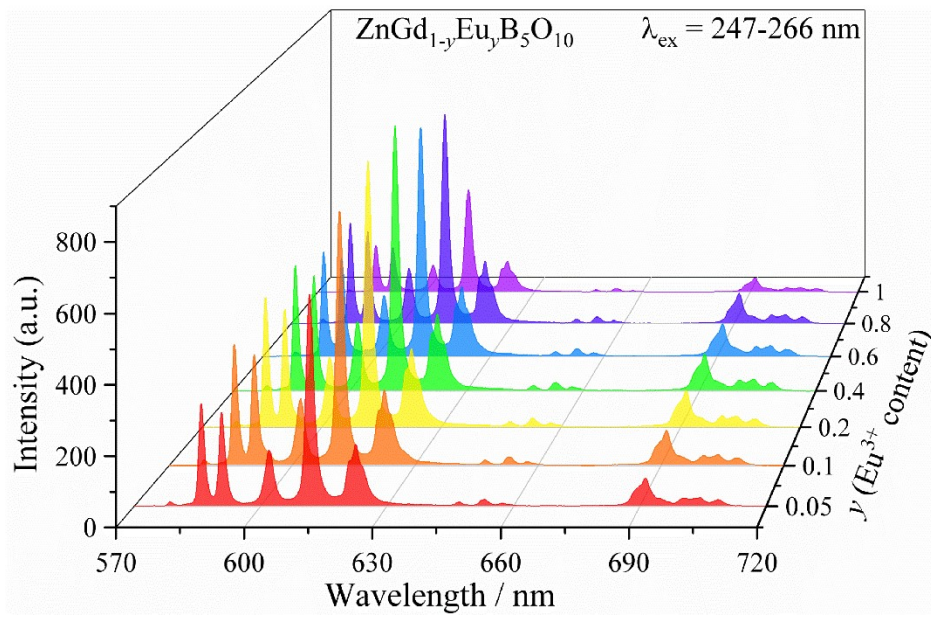

**Fig. S4.** PL emission spectra under the excitation at 247-266 nm for  $\text{ZnGd}_{1-y}\text{Eu}_y\text{B}_5\text{O}_{10}$  ( $0.05 \leq y \leq 1$ ).

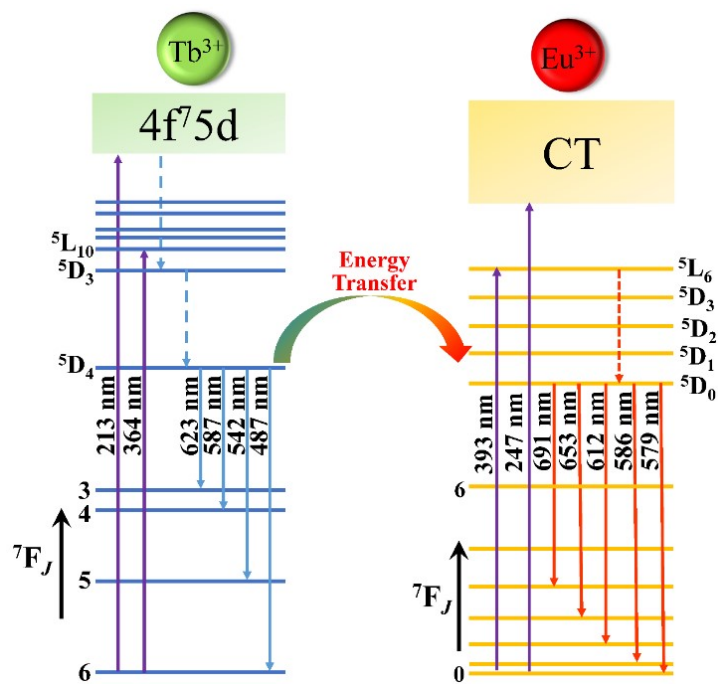

**Fig. S5.** Schematic energy level diagram and energy-transfer process from Tb<sup>3+</sup> to Eu<sup>3+</sup> in ZnGdB<sub>5</sub>O<sub>10</sub>.
